# Supplementary material for: Clinical Features and Laboratory Examination to Identify Severe Patients with COVID-19: A Systematic Review and Meta-Analysis
Source: PubMed Central journal article supplement (PMC8593588; doi:10.1155/2021/6671291), 2021-11-15
Supplement: 6671291.f1.pdf [file 6671291.f1.pdf]

| Disease | Study                | Estimate       | 95%CI            |
|---------|----------------------|----------------|------------------|
| 2       | cardiacdisease       | Chaolin Huang  | 2.53 (2.3,2.1)   |
| 3       | cardiacdisease       | Hansheng Xie   | 2.6 (2.11,3.2)   |
| 4       | cardiacdisease       | Suxin Wan      | 2.4 (1.87,3.07)  |
| 5       | cardiacdisease       | Dawei Wang     | 2.55 (1.99,3.25) |
| 6       | cardiacdisease       | Jinjin Zhang   | 2.63 (2.1,3.28)  |
| 7       | cardiacdisease       | Qingxian Cai   | 2.4 (1.86,3.1)   |
| 8       | cardiacdisease       | Weijie Guan    | 2.48 (1.92,3.21) |
| 9       | cardiacdisease       | Ming Chen      | 2.51 (1.94,3.26) |
| 10      | cardiacdisease       | Dan Li 1       | 2.5 (1.97,3.18)  |
| 11      | cardiacdisease       | Dan Li 2       | 2.49 (1.95,3.17) |
| 12      | cardiacdisease       | Zilong Lu      | 2.45 (1.89,3.16) |
| 13      | cardiacdisease       | Wei Zhang      | 2.38 (1.97,2.88) |
| 14      | cardiacdisease       | Combined       | 2.49 (1.98,3.13) |
| 15      |                      | NA             | (NA,NA)          |
| 16      | chesttightness       | Guang Chen     | 2.26 (1.03,4.98) |
| 17      | chesttightness       | Yuhuan Xu      | 1.85 (0.88,3.89) |
| 18      | chesttightness       | Jiaojiao Chu   | 2.94 (1.61,5.36) |
| 19      | chesttightness       | Ming Chen      | 2.39 (0.86,6.63) |
| 20      | chesttightness       | Tianxin Xiang  | 2.47 (1.24,4.92) |
| 21      | chesttightness       | Shuxiang Zhang | 2 (1.08,3.73)    |
| 22      | chesttightness       | Combined       | 2.27 (1.17,4.39) |
| 23      |                      | -----NA        | (NA,NA)          |
| 24      | chronicliverdisease  | Suxin Wan      | 1.37 (0.97,1.95) |
| 25      | chronicliverdisease  | Dan Li 1       | 1.38 (0.98,1.95) |
| 26      | chronicliverdisease  | Qiu Wan        | 1.39 (0.98,1.96) |
| 27      | chronicliverdisease  | Tianxin Xiang  | 1.42 (1.01,2)    |
| 28      | chronicliverdisease  | Wei Zhang      | 1.4 (0.99,1.97)  |
| 29      | chronicliverdisease  | Chaolin Huang  | 1.41 (1,1.98)    |
| 30      | chronicliverdisease  | Dawei Wang     | 1.42 (1.01,2)    |
| 31      | chronicliverdisease  | Jinjin Zhang   | 1.44 (0.98,2.11) |
| 32      | chronicliverdisease  | Jian Wu        | 1.23 (0.83,1.82) |
| 33      | chronicliverdisease  | Qingxian Cai   | 1.32 (0.88,1.99) |
| 34      | chronicliverdisease  | Weijie Guan    | 1.46 (1.04,2.07) |
| 35      | chronicliverdisease  | Combined       | 1.39 (0.99,1.95) |
| 36      |                      | -----NA        | (NA,NA)          |
| 37      | Chronicreldiseases   | Dawei Wang     | 2.59 (1.93,3.48) |
| 38      | Chronicreldiseases   | Jinjin Zhang   | 2.6 (1.87,3.61)  |
| 39      | Chronicreldiseases   | Jian Wu        | 2.53 (1.86,3.45) |
| 40      | Chronicreldiseases   | Weijie Guan    | 2.52 (1.88,3.36) |
| 41      | Chronicreldiseases   | Dan Li 1       | 2.42 (1.79,3.28) |
| 42      | Chronicreldiseases   | Zilong Lu      | 2.38 (1.67,3.41) |
| 43      | Chronicreldiseases   | Wei Zhang      | 2.45 (1.8,3.32)  |
| 44      | Chronicreldiseases   | Combined       | 2.5 (1.87,3.33)  |
| 45      |                      | -----NA        | (NA,NA)          |
| 46      | ChronicRespiratorysy | Chaolin Huang  | 2.69 (2.12,3.41) |
| 47      | ChronicRespiratorysy | Dawei Wang     | 2.63 (2.06,3.37) |
| 48      | ChronicRespiratorysy | Jinjin Zhang   | 2.77 (2.15,3.55) |
| 49      | ChronicRespiratorysy | Jian Wu        | 2.68 (2.11,3.41) |
| 50      | ChronicRespiratorysy | Weijie Guan    | 2.54 (1.98,3.24) |
| 51      | ChronicRespiratorysy | Ming Chen      | 2.97 (2.28,3.87) |
| 52      | ChronicRespiratorysy | Dan Li 1       | 2.63 (2.07,3.33) |
| 53      | ChronicRespiratorysy | Qiu Wan        | 2.56 (2.02,3.24) |
| 54      | ChronicRespiratorysy | Wei Zhang      | 2.6 (2.04,3.32)  |
| 55      | ChronicRespiratorysy | Shuxiang Zhang | 2.71 (2.16,3.4)  |
| 56      | ChronicRespiratorysy | Combined       | 2.67 (2.13,3.37) |
| 57      |                      | -----NA        | (NA,NA)          |
| 58      | Cough                | Yulong Zhou    | 1.29 (1.06,1.58) |

|     |          |                |                  |
|-----|----------|----------------|------------------|
| 59  | Cough    | Guang Chen     | 1.35 (1.12,1.63) |
| 60  | Cough    | Chaolin Huang  | 1.3 (1.06,1.6)   |
| 61  | Cough    | Yuhuan Xu      | 1.32 (1.07,1.62) |
| 62  | Cough    | Jiaojiao Chu   | 1.35 (1.09,1.66) |
| 63  | Cough    | Kaikai Liu     | 1.32 (1.07,1.63) |
| 64  | Cough    | Hansheng Xie   | 1.33 (1.08,1.65) |
| 65  | Cough    | Dawei Wang     | 1.35 (1.09,1.67) |
| 66  | Cough    | Sijia Tian     | 1.31 (1.05,1.63) |
| 67  | Cough    | Jian Wu        | 1.23 (1.08,1.4)  |
| 68  | Cough    | Qingxian Cai   | 1.29 (1.04,1.61) |
| 69  | Cough    | Weijie Guan    | 1.36 (1.06,1.73) |
| 70  | Cough    | Ming Chen      | 1.3 (1.05,1.6)   |
| 71  | Cough    | Dan Li 2       | 1.31 (1.06,1.61) |
| 72  | Cough    | Zilong Lu      | 1.31 (1.05,1.62) |
| 73  | Cough    | Qiu Wan        | 1.29 (1.05,1.58) |
| 74  | Cough    | Rong Wang      | 1.29 (1.04,1.6)  |
| 75  | Cough    | Tianxin Xiang  | 1.28 (1.05,1.57) |
| 76  | Cough    | Wei Zhang      | 1.33 (1.08,1.64) |
| 77  | Cough    | Shuxiang Zhang | 1.31 (1.07,1.61) |
| 78  | Cough    | Cancan Zhao    | 1.31 (1.07,1.61) |
| 79  | Cough    | Combined       | 1.31 (1.07,1.6)  |
| 80  |          | ----- NA       | (NA,NA)          |
| 81  | Diabetes | Guang Chen     | 2.05 (1.76,2.38) |
| 82  | Diabetes | Chaolin Huang  | 2.11 (1.82,2.45) |
| 83  | Diabetes | Hansheng Xie   | 2.1 (1.81,2.45)  |
| 84  | Diabetes | Suxin Wan      | 1.98 (1.69,2.31) |
| 85  | Diabetes | Dawei Wang     | 2 (1.71,2.34)    |
| 86  | Diabetes | Jinjin Zhang   | 2.15 (1.84,2.51) |
| 87  | Diabetes | Qingxian Cai   | 2 (1.71,2.34)    |
| 88  | Diabetes | Weijie Guan    | 1.92 (1.63,2.27) |
| 89  | Diabetes | Dan Li 1       | 1.98 (1.7,2.31)  |
| 90  | Diabetes | Dan Li 2       | 2.06 (1.78,2.4)  |
| 91  | Diabetes | Zilong Lu      | 2.07 (1.78,2.41) |
| 92  | Diabetes | Qiu Wan        | 1.98 (1.7,2.3)   |
| 93  | Diabetes | Rong Wang      | 2.14 (1.81,2.53) |
| 94  | Diabetes | Tianxin Xiang  | 2 (1.72,2.33)    |
| 95  | Diabetes | Wei Zhang      | 2.02 (1.74,2.35) |
| 96  | Diabetes | Cancan Zhao    | 1.93 (1.65,2.26) |
| 97  | Diabetes | Combined       | 2.03 (1.75,2.36) |
| 98  |          | ----- NA       | (NA,NA)          |
| 99  | Diarrhea | Guang Chen     | 1.84 (1.36,2.49) |
| 100 | Diarrhea | Chaolin Huang  | 1.79 (1.29,2.47) |
| 101 | Diarrhea | Jiaojiao Chu   | 1.95 (1.4,2.7)   |
| 102 | Diarrhea | Hansheng Xie   | 1.75 (1.23,2.51) |
| 103 | Diarrhea | Dawei Wang     | 1.74 (1.22,2.51) |
| 104 | Diarrhea | Jian Wu        | 1.51 (1.2,1.9)   |
| 105 | Diarrhea | Qingxian Cai   | 1.69 (1.19,2.41) |
| 106 | Diarrhea | Weijie Guan    | 1.77 (1.23,2.56) |
| 107 | Diarrhea | Dan Li 1       | 1.77 (1.25,2.5)  |
| 108 | Diarrhea | Tianxin Xiang  | 1.78 (1.28,2.46) |
| 109 | Diarrhea | Wei Zhang      | 1.68 (1.18,2.37) |
| 110 | Diarrhea | Combined       | 1.76 (1.28,2.42) |
| 111 |          | ----- NA       | (NA,NA)          |
| 112 | Fatigue  | Yulong Zhou    | 1.53 (1.05,2.23) |
| 113 | Fatigue  | Guang Chen     | 1.57 (1.08,2.29) |
| 114 | Fatigue  | Yuhuan Xu      | 1.42 (1.01,1.98) |
| 115 | Fatigue  | Jiaojiao Chu   | 1.75 (1.22,2.51) |
| 116 | Fatigue  | Kaikai Liu     | 1.59 (1.07,2.36) |

|     |              |                |                  |
|-----|--------------|----------------|------------------|
| 117 | Fatigue      | Sijia Tian     | 1.63 (1.08,2.47) |
| 118 | Fatigue      | Qingxian Cai   | 1.63 (1.1,2.41)  |
| 119 | Fatigue      | Ming Chen      | 1.71 (1.15,2.54) |
| 120 | Fatigue      | Dan Li 1       | 1.57 (1.06,2.32) |
| 121 | Fatigue      | Zilong Lu      | 1.65 (1.09,2.48) |
| 122 | Fatigue      | Qiu Wan        | 1.43 (1.01,2.01) |
| 123 | Fatigue      | Tianxin Xiang  | 1.56 (1.06,2.29) |
| 124 | Fatigue      | Wei Zhang      | 1.65 (1.14,2.4)  |
| 125 | Fatigue      | Combined       | 1.59 (1.1,2.29)  |
| 126 |              | ----- NA       | (NA,NA)          |
| 127 | Fever        | Yulong Zhou    | 1.34 (0.98,1.84) |
| 128 | Fever        | Guang Chen     | 1.38 (1.01,1.88) |
| 129 | Fever        | Chaolin Huang  | 1.32 (0.97,1.8)  |
| 130 | Fever        | Yuhuan Xu      | 1.38 (1.02,1.89) |
| 131 | Fever        | Jiaojiao Chu   | 1.37 (1.02,1.85) |
| 132 | Fever        | Kaikai Liu     | 1.32 (0.97,1.79) |
| 133 | Fever        | Hansheng Xie   | 1.27 (0.93,1.72) |
| 134 | Fever        | Dawei Wang     | 1.32 (0.97,1.79) |
| 135 | Fever        | Sijia Tian     | 1.38 (0.99,1.91) |
| 136 | Fever        | Jian Wu        | 1.24 (0.95,1.61) |
| 137 | Fever        | Qingxian Cai   | 1.2 (0.91,1.59)  |
| 138 | Fever        | Weijie Guan    | 1.4 (0.95,2.07)  |
| 139 | Fever        | Ming Chen      | 1.29 (0.95,1.76) |
| 140 | Fever        | Dan Li 1       | 1.29 (0.95,1.75) |
| 141 | Fever        | Dan Li 2       | 1.29 (0.96,1.74) |
| 142 | Fever        | Zilong Lu      | 1.36 (0.98,1.89) |
| 143 | Fever        | Qiu Wan        | 1.26 (0.93,1.71) |
| 144 | Fever        | Rong Wang      | 1.37 (0.97,1.92) |
| 145 | Fever        | Tianxin Xiang  | 1.37 (1,1.87)    |
| 146 | Fever        | Wei Zhang      | 1.31 (0.97,1.79) |
| 147 | Fever        | Cancan Zhao    | 1.31 (0.96,1.78) |
| 148 | Fever        | Combined       | 1.32 (0.98,1.79) |
| 149 |              | ----- NA       | (NA,NA)          |
| 150 | Headache     | Guang Chen     | 1.08 (0.8,1.44)  |
| 151 | Headache     | Chaolin Huang  | 1.09 (0.81,1.45) |
| 152 | Headache     | Yuhuan Xu      | 1.04 (0.78,1.4)  |
| 153 | Headache     | Dawei Wang     | 1.05 (0.78,1.42) |
| 154 | Headache     | Sijia Tian     | 1.08 (0.8,1.45)  |
| 155 | Headache     | Qingxian Cai   | 1.08 (0.81,1.44) |
| 156 | Headache     | Weijie Guan    | 1.01 (0.65,1.56) |
| 157 | Headache     | Dan Li 1       | 1.06 (0.79,1.43) |
| 158 | Headache     | Zilong Lu      | 1.1 (0.82,1.48)  |
| 159 | Headache     | Wei Zhang      | 1.08 (0.81,1.44) |
| 160 | Headache     | Shuxiang Zhang | 1.08 (0.81,1.44) |
| 161 | Headache     | Combined       | 1.07 (0.8,1.43)  |
| 162 |              | ----- NA       | (NA,NA)          |
| 163 | Hypertension | Guang Chen     | 2.21 (1.76,2.78) |
| 164 | Hypertension | Chaolin Huang  | 2.23 (1.79,2.78) |
| 165 | Hypertension | Hansheng Xie   | 2.28 (1.85,2.82) |
| 166 | Hypertension | Suxin Wan      | 2.26 (1.82,2.81) |
| 167 | Hypertension | Dawei Wang     | 2.14 (1.7,2.68)  |
| 168 | Hypertension | Jinjin Zhang   | 2.28 (1.82,2.86) |
| 169 | Hypertension | Qingxian Cai   | 2.11 (1.69,2.65) |
| 170 | Hypertension | Weijie Guan    | 2.24 (1.76,2.84) |
| 171 | Hypertension | Ming Chen      | 2.21 (1.74,2.81) |
| 172 | Hypertension | Dan Li 1       | 2.15 (1.71,2.69) |
| 173 | Hypertension | Dan Li 2       | 2.22 (1.8,2.75)  |
| 174 | Hypertension | Zilong Lu      | 2.12 (1.69,2.65) |

|                      |                |                  |
|----------------------|----------------|------------------|
| 175 Hypertension     | Qiu Wan        | 2.19 (1.75,2.75) |
| 176 Hypertension     | Rong Wang      | 2.24 (1.77,2.83) |
| 177 Hypertension     | Tianxin Xiang  | 2.12 (1.71,2.63) |
| 178 Hypertension     | Wei Zhang      | 2.13 (1.7,2.65)  |
| 179 Hypertension     | Shuxiang Zhang | 2.17 (1.74,2.71) |
| 180 Hypertension     | Cancan Zhao    | 2.13 (1.7,2.66)  |
| 181 Hypertension     | Combined       | 2.19 (1.76,2.72) |
| 182                  | ----- NA       | (NA,NA)          |
| 183 maligncy         | Chaolin Huang  | 2.16 (1.5,3.13)  |
| 184 maligncy         | Suxin Wan      | 1.93 (1.26,2.96) |
| 185 maligncy         | Dawei Wang     | 2.25 (1.5,3.37)  |
| 186 maligncy         | Jian Wu        | 2.21 (1.5,3.26)  |
| 187 maligncy         | Qingxian Cai   | 1.98 (1.33,2.94) |
| 188 maligncy         | Dan Li 1       | 1.95 (1.32,2.89) |
| 189 maligncy         | Wei Zhang      | 1.88 (1.25,2.84) |
| 190 maligncy         | Combined       | 2.04 (1.41,2.95) |
| 191                  | ----- NA       | (NA,NA)          |
| 192 Myalgia          | Guang Chen     | 1.79 (0.87,3.7)  |
| 193 Myalgia          | Yuhuan Xu      | 1.66 (0.81,3.4)  |
| 194 Myalgia          | Jiaojiao Chu   | 1.92 (0.96,3.84) |
| 195 Myalgia          | Jian Wu        | 1.55 (0.76,3.19) |
| 196 Myalgia          | Ming Chen      | 2 (1.07,3.72)    |
| 197 Myalgia          | Dan Li 1       | 1.97 (1.01,3.84) |
| 198 Myalgia          | Qiu Wan        | 1.43 (0.74,2.79) |
| 199 Myalgia          | Wei Zhang      | 1.81 (0.93,3.5)  |
| 200 Myalgia          | Shuxiang Zhang | 1.52 (0.81,2.87) |
| 201 Myalgia          | Combined       | 1.72 (0.91,3.27) |
| 202                  | ----- NA       | (NA,NA)          |
| 203 Shortofbreath    | Yulong Zhou    | 3.49 (2.28,5.36) |
| 204 Shortofbreath    | Guang Chen     | 3.22 (2.11,4.91) |
| 205 Shortofbreath    | Chaolin Huang  | 3.23 (2.1,4.95)  |
| 206 Shortofbreath    | Jiaojiao Chu   | 3.77 (2.48,5.74) |
| 207 Shortofbreath    | Hansheng Xie   | 3.67 (2.35,5.71) |
| 208 Shortofbreath    | Dawei Wang     | 3.33 (2.1,5.28)  |
| 209 Shortofbreath    | Sijia Tian     | 3.12 (1.99,4.87) |
| 210 Shortofbreath    | Jian Wu        | 3.09 (2.09,4.56) |
| 211 Shortofbreath    | Weijie Guan    | 3.58 (2.13,6)    |
| 212 Shortofbreath    | Ming Chen      | 3.58 (2.26,5.65) |
| 213 Shortofbreath    | Dan Li 1       | 3 (1.99,4.52)    |
| 214 Shortofbreath    | Dan Li 2       | 3.26 (2.09,5.09) |
| 215 Shortofbreath    | Qiu Wan        | 3.46 (2.2,5.44)  |
| 216 Shortofbreath    | Wei Zhang      | 3.43 (2.18,5.41) |
| 217 Shortofbreath    | Cancan Zhao    | 3.28 (2.07,5.21) |
| 218 Shortofbreath    | Combined       | 3.35 (2.19,5.11) |
| 219                  | ----- NA       | (NA,NA)          |
| 220 Sorethroat       | Yuhuan Xu      | 1.44 (0.77,2.71) |
| 221 Sorethroat       | Jiaojiao Chu   | 1.48 (0.76,2.88) |
| 222 Sorethroat       | Dawei Wang     | 1.23 (0.59,2.55) |
| 223 Sorethroat       | Jian Wu        | 1.28 (0.86,1.9)  |
| 224 Sorethroat       | Qingxian Cai   | 1.44 (0.77,2.66) |
| 225 Sorethroat       | Weijie Guan    | 1.66 (0.96,2.86) |
| 226 Sorethroat       | Tianxin Xiang  | 1.51 (0.83,2.74) |
| 227 Sorethroat       | Wei Zhang      | 1.47 (0.8,2.71)  |
| 228 Sorethroat       | Cancan Zhao    | 1.32 (0.65,2.68) |
| 229 Sorethroat       | Combined       | 1.41 (0.77,2.56) |
| 230                  | ----- NA       | (NA,NA)          |
| 231 Sputumproduction | Guang Chen     | 1.23 (0.96,1.59) |
| 232 Sputumproduction | Yuhuan Xu      | 1.21 (0.94,1.57) |

|                      |                |                  |
|----------------------|----------------|------------------|
| 233 Sputumproduction | Jiaojiao Chu   | 1.23 (0.92,1.64) |
| 234 Sputumproduction | Kaikai Liu     | 1.17 (0.91,1.51) |
| 235 Sputumproduction | Hansheng Xie   | 1.23 (0.95,1.61) |
| 236 Sputumproduction | Zilong Lu      | 1.26 (0.98,1.62) |
| 237 Sputumproduction | Qiu Wan        | 1.12 (0.91,1.38) |
| 238 Sputumproduction | Tianxin Xiang  | 1.12 (0.93,1.36) |
| 239 Sputumproduction | Wei Zhang      | 1.22 (0.95,1.57) |
| 240 Sputumproduction | Shuxiang Zhang | 1.22 (0.96,1.57) |
| 241 Sputumproduction | Cancan Zhao    | 1.21 (0.93,1.58) |
| 242 Sputumproduction | Chaolin Huang  | 1.19 (0.92,1.54) |
| 243 Sputumproduction | Dawei Wang     | 1.26 (0.97,1.62) |
| 244 Sputumproduction | Weijie Guan    | 1.24 (0.92,1.67) |
| 245 Sputumproduction | Combined       | 1.21 (0.95,1.54) |
